# Supplementary material
Source: PubMed Central journal article supplement (PMC10786609)
Supplement: jasn-35-057-s001.pdf [file jasn-35-057-s001.pdf]

## Supplemental Material

### Table of Contents

|                                 |   |
|---------------------------------|---|
| 1. Supplemental Figure 1.....   | 1 |
| 2. Supplemental Table 1.....    | 2 |
| 3. Supplemental References..... | 3 |

### 1. Supplemental Figure 1. Effect of sodium bicarbonate on urinary pH and ammonium and serum total CO<sub>2</sub> in the subset of BASE Pilot Trial participants who were studied here.

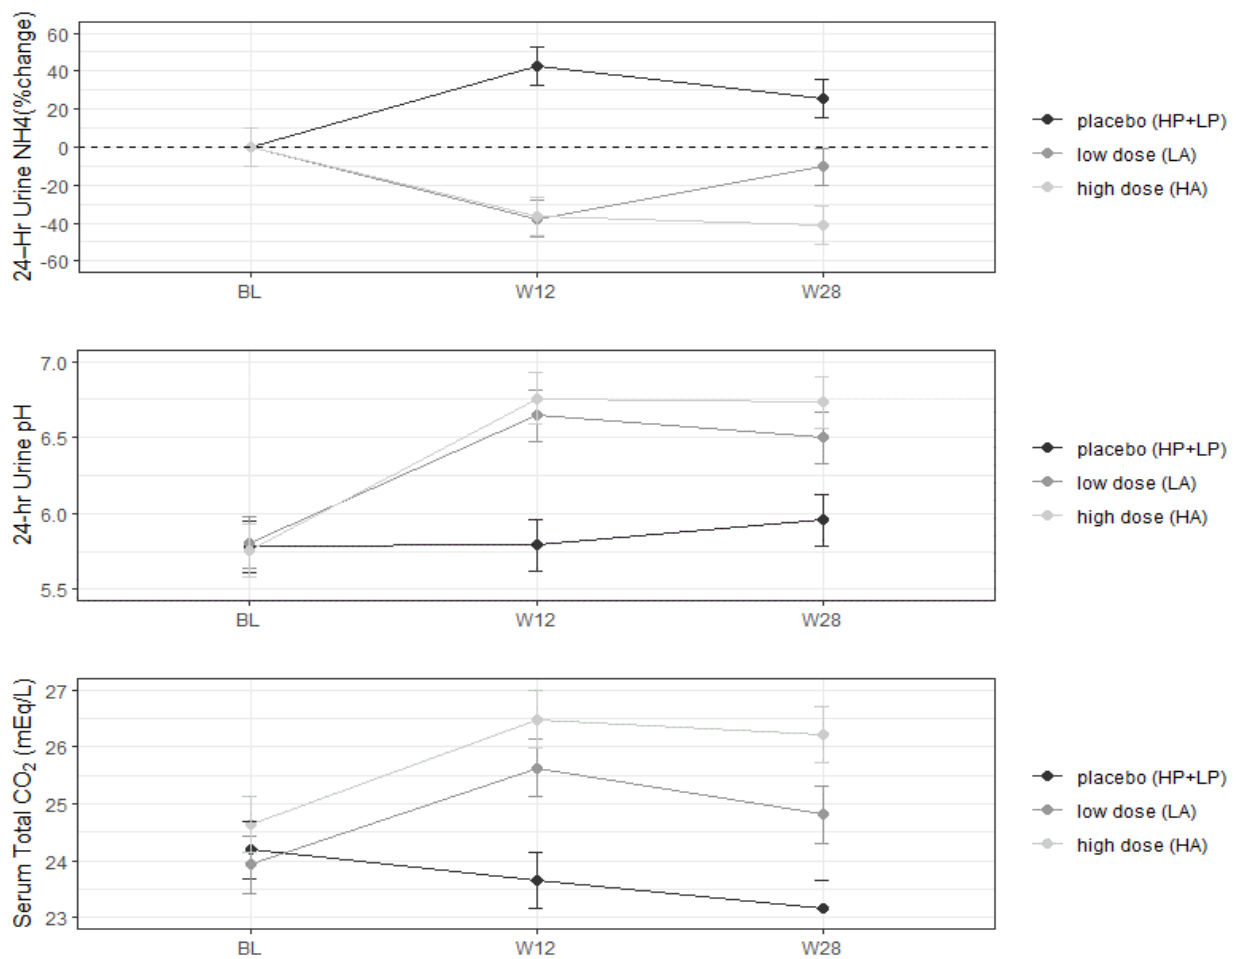

**2. Supplemental Table 1.** Examples of normal values for bone turnover markers and klotho

|                                                                                                                                                                       |                                                                                                                                                                                                                                                                                                      |
|-----------------------------------------------------------------------------------------------------------------------------------------------------------------------|------------------------------------------------------------------------------------------------------------------------------------------------------------------------------------------------------------------------------------------------------------------------------------------------------|
| <b>Bone-specific alkaline phosphatase<sup>1</sup></b><br>Premenopausal females:<br>Postmenopausal females:<br>Males older than 25 years:                              | <b>Range</b><br>4.5-16.9 µg/L<br>7.0-22.4 µg/L<br>6.5–20.1 µg/L                                                                                                                                                                                                                                      |
| <b>Procollagen type I intact N-terminal peptide<sup>1</sup></b><br>Premenopausal females:<br>Postmenopausal females:<br>Males:                                        | <b>Range</b><br>20-101 µg/L<br>16-96 µg/L<br>22-105 µg/L                                                                                                                                                                                                                                             |
| <b>C-telopeptide<sup>1</sup></b><br>Premenopausal females:<br>Postmenopausal females:<br>Males 60-69 years:                                                           | <b>Range</b><br>136-689 pg/L<br>16-96 pg/L<br>132-752 pg/L                                                                                                                                                                                                                                           |
| <b>Tartrate-resistant acid phosphatase 5b<sup>2</sup></b><br>Premenopausal females:<br>Postmenopausal females:<br>Males:                                              | <b>Mean (SD)</b><br>2.9 (0.9) U/L<br>3.3 (1.5) U/L<br>3.2 (1.2) U/L                                                                                                                                                                                                                                  |
| <b>Soluble klotho<sup>3</sup></b><br>All:<br>Men:<br>Women:<br>18–34.9 years:<br>Men:<br>Women:<br>35–54.9 years:<br>Men:<br>Women:<br>55–85 years:<br>Men:<br>Women: | <b>Mean (SD)</b><br>813.8 (461.2) pg/mL<br>728.3 (412.0) pg/mL<br>874.0 (485.0) pg/mL<br>932.6 (575.6) pg/mL<br>850.9 (566.4) pg/mL<br>975.9 (578.3) pg/mL<br>796.7 (317.4) pg/mL<br>733.9 (249.6) pg/mL<br>851.5 (360.2) pg/mL<br>612.1 (198.2) pg/mL<br>567.9 (192.5) pg/mL<br>655.5 (196.2) pg/mL |

### 3. Supplemental References

1. <https://www.aruplab.com>
2. <https://www.idsplc.com/wp-content/uploads/2015/03/ML1007-IDS-iSYS-TRAcP-5b-Technical-Sales-Sheet-EUR-V1.0.pdf>
3. Espuch-Oliver A, Vázquez-Lorente H, Jurado-Fasoli L, de Haro-Muñoz T, Díaz-Alberola I, López-Velez MDS, de Haro-Romero T, Castillo MJ, Amaro-Gahete FJ. Reference Values of Soluble  $\alpha$ -Klotho Serum Levels Using an Enzyme-Linked Immunosorbent Assay in Healthy Adults Aged 18-85 Years. *J Clin Med*. 2022 Apr 25;11(9):2415. doi: 10.3390/jcm11092415. PMID: 35566540; PMCID: PMC9101232.
